# Supplementary material for: PACo: A Novel Procrustes Application to Cophylogenetic Analysis
Source: PubMed Central journal article supplement (PMC3620278; doi:10.1371/journal.pone.0061048), 2013-04-08
Supplement: pone.0061048.s001.pdf [file pone.0061048.s001.pdf]

**File S1 – Supporting information for****PACo: a novel Procrustes application to cophylogenetic analysis****PACo in R – User Guide**Juan Antonio Balbuena<sup>1\*</sup>, Raúl Míguez-Lozano<sup>1</sup>, Isabel Blasco-Costa<sup>2</sup><sup>1</sup> Cavanilles Institute of Biodiversity and Evolutionary Biology, University of Valencia, Valencia, Spain.<sup>2</sup> Institute of Parasitology, Academy of Sciences of the Czech Republic, České Budějovice, Czech Republic.\*E-mail: [j.a.balbuena@uv.es](mailto:j.a.balbuena@uv.es)**Introduction**

We present an R [1] script to carry out PACo (**P**rocrustes **A**pproach to **C**ophylogeny), an application of Procrustes analysis for comparison of phylogenetic trees of associated organisms, such as hosts and parasites. PACo provides a residual sum of squares of the Procrustean fit that measures the congruence between two given phylogenies and uses a permutation approach to test its significance. The analysis allows for multiple host-parasite associations and different number of hosts and parasites. Because in the Procrustean superimposition the host matrix is kept fixed, whereas the parasite matrix is rotated and scaled to fit the former, PACo tests the classical view of whether the parasite phylogeny is constrained by the host phylogeny [2]. This implies that the null hypothesis tested is slightly different from that of previous tests of phylogenetic congruence [3-5]. In addition to hypothesis testing, PACo provides a superimposition plot enabling a graphical comparison of the fit of the host-parasite associations, and a residual bar chart for evaluation of the contribution of the individual host-parasite associations to the global fit.

**The R script**

All the computations described in the accompanying paper can be carried out with the R script below. R runs on a wide variety of Linux/Unix platforms, Windows and MacOS and can be downloaded at <http://www.r-project.org/>. In addition to the basic R install, two dedicated packages need to be installed to implement PACo: `ape` [6], required for handling of phylogenetic data and Principal Coordinates Ordination and `vegan` [7], required for Procrustes fitting. (See <http://cran.r-project.org/doc/manuals/R-admin.html#Installing-packages> for details on how to install R packages). In order to assist users with little or no experience with R, we provide annotations to the script. The analyses can be implemented by cutting and pasting the code below in an opened R console. The text in red identifies parameters that can be customized to adapt the analysis to the user's needs.

The script is demonstrated with the phylogenies of pocket gophers and their chewing lice based on the mitochondrial cytochrome oxidase I sequences of Hafner et al. [8], which represents a classical example of host-parasite cospeciation [9]. The input files required are shown in the Appendix below and can be downloaded, together with a fully annotated R script, at <http://www.uv.es/cophylpaco/index.html>.

First, load the two packages required. At the R prompt, write

```
library(ape)
library(vegan)
```

### *Data input*

Input files should be in plain text format either space- or tab-delimited. (See Appendix for examples). Three files are required. Two of them encapsulate the host and parasite phylogenies, respectively, and will eventually be transformed into distance matrices between host or parasite taxa. The third one consists of a binary matrix coding the host-parasite associations, where host species are arranged in rows and parasites in columns; 1's indicate occurrence of a given parasite in a given host and 0's denote parasite absences in the host. The input files should **include taxa labels that have to match exactly in the three files**. Any mismatch will cause execution errors and/or incorrect results. (For clarity of the graphical output, short labels are recommended.)

The following syntax reads the matrix of host-parasite associations and computes the number of associations (NLinks) required for further computations:

```
HP <- as.matrix(read.table("PACo/example/gophers/g-1_links.txt", header=TRUE))
NLinks = sum(HP)
```

As illustrated by the foregoing code, the path pointing to the file system location should be indicated in quotation marks. [Windows users should also note that folder names are separated by forward (/), instead of backward (\) slashes.] Alternatively, one can open the input files interactively with `file.choose()`, e.g.

```
HP <- as.matrix(read.table(file.choose(), header=TRUE))
```

The syntax to load the phylogenetic input depends on the type of data used. There are three possibilities: (a) phylogenetic trees, (b) aligned sequences or (c) distance matrices.

#### *a) Phylogenetic trees*

Use the `read.tree` or `read.nexus` functions to open tree files in Newick or Nexus formats, respectively.

For instance,

```
TreeH <- read.tree("PACo/example/gophers/phylo_gopher.tre")
TreeP <- read.tree("PACo/example/gophers/phylo_lice.tre")
```

The host and parasite trees are then transformed for further analysis into respective matrices of patristic distances (host.D and para.D):

```
host.D <- cophenetic(TreeH)
para.D <- cophenetic(TreeP)
```

### b) *Aligned sequences*

The `read.dna` function can read sequences in different formats. (Consult the `ape` package tutorial for details). In this example the files are in fasta format:

```
seqH <- read.dna("PACo/example/gophers/align_gopher.fasta", format="fasta")
seqP <- read.dna("PACo/example/gophers/align_lice.fasta", format="fasta")
```

Next, the sequence data is used to compute genetic distance matrices of hosts and parasites:

```
host.D <- dist.dna(seqH, model = "F84", as.matrix=TRUE)
para.D <- dist.dna(seqP, model = "F84", as.matrix=TRUE)
```

The `dist.dna` function allows choosing among a range of evolutionary models [6]. The example above uses the Felsenstein's substitution model (F84) [10].

### c) *Distance matrices*

Text files with square distance or dissimilarity matrices can also be used as input:

```
host.D <- as.matrix(read.table("PACo/example/gophers/dist_gopher.txt",
header=TRUE))
para.D <- as.matrix(read.table("PACo/example/gophers/dist_lice.txt",
header=TRUE))
```

The files `dist_gopher.txt` and `dist_lice.txt` (see Appendix), contain genetic distances computed with PAUP\* [11] using the HKY85 [12] substitution model.

**All the demonstrations below use this third input option (HKY85 genetic distances).**

### *Procustean Superimposition*

The host and parasite distance matrices are first sorted according, respectively, to the order of rows (hosts) and columns (parasites) of the host-parasite association matrix:

```
host.D <- host.D[rownames(HP), rownames(HP)]
para.D <- para.D[colnames(HP), colnames(HP)]
```

The `PACo` function, defined below, transforms the host and parasite distance matrices into the respective matrices of Principal Coordinates (`pcoa` of `ape`) and duplicates taxa (if necessary) to accommodate multiple host-parasite associations:

```
PACo <- function (H.dist, P.dist, HP.bin)
{HP.bin <- which(HP.bin > 0, arr.in=TRUE)
H.PCo <- pcoa(H.dist, correction="cailliez")$vectors
```

```
P.PCo <- pcoa(P.dist, correction="cailliez")$vectors
H.PCo <- H.PCo[HP.bin[,1],]
P.PCo <- P.PCo[HP.bin[,2],]
list (H.PCo = H.PCo, P.PCo = P.PCo)}
```

PACo is then applied to the input and a Procrustes fit is carried out:

```
PACo.fit <- PACo(host.D, para.D, HP)
HP.proc <- procrustes(PACo.fit$H.PCo, PACo.fit$P.PCo)
```

The program produces the following output:

```
Warning message:
In procrustes(PACo.fit$H.PCo, PACo.fit$P.PCo) :
  X has fewer axes than Y: X adjusted to conform Y.
```

This indicates that the host input matrix has fewer columns than the parasite counterpart. No action by the user is required since the narrower matrix is completed with zero columns [13].

To visualize the host-parasite superimposition plot, as show in Figure S1.1:

```
HostX <- HP.proc$X
ParY <- HP.proc$Yrot
plot(HostX, asp=1, pch=46)
points(ParY, pch=1)
arrows(ParY[,1], ParY[,2], HostX[,1], HostX[,2], length=0.12, angle=15,
xpd=FALSE)
HostX <- unique(HP.proc$X)
ParY <- unique(HP.proc$Yrot)
identify(ParY[,1], ParY[,2], rownames(ParY), offset=0.3, xpd=FALSE, cex=0.8)
identify(HostX[,1], HostX[,2], rownames(HostX),offset=0.3, xpd=TRUE, cex= 0.8)
```

With `identify` the user can label the data points interactively by clicking near each data point on the plot. First label the parasite locations and then those of the hosts.

### ***Goodness-of-fit test***

The following code computes the residual sum of squares  $m_{XY}^2$  and performs a randomization of the host-parasite association matrix to establish the probability  $P$  under  $H_0$ :

```
m2.obs <- HP.proc$ss
N.perm = 100000
```

where `N.perm` sets the number of random permutations of the host-parasite association matrix. For high precision of the  $P$  estimate, 100,000 permutations were used in the accompanying paper. Although computing time was not prohibitive (some 24 min. on a PC equipped with an Intel Core 2 CPU 6600 @ 2.40GHz processor), in most situations  $\leq 10,000$  permutations would be sufficient for hypothesis testing.

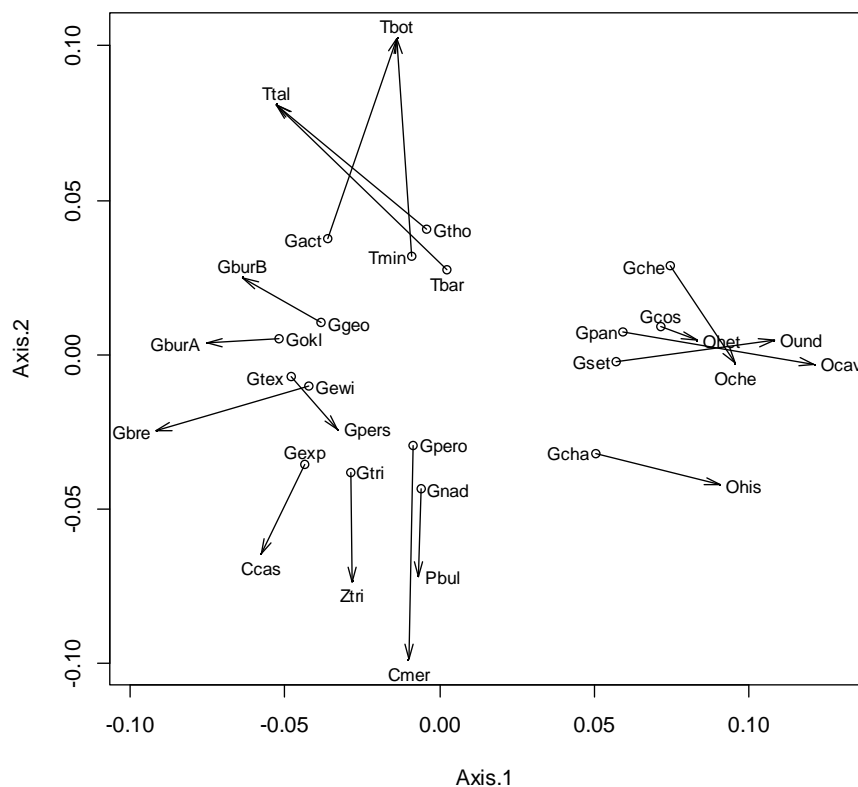

**Figure S1. Procrustean superimposition plot of pocket gophers and chewing lice.** The ordinations of gopher and lice are Principal Correspondence Coordinates of HKY85 genetic distances. The lice configuration (dots) has been rotated and scaled to fit the gopher ordination (arrow tips). See Appendix for abbreviations of taxa.

```
P.value = 0
```

```
set.seed(.Random.seed[trunc(runif(1,1,626))])
```

The last line sets the randomization seed. To obtain reproducible sets of permutations, use instead an integer of choice, for instance `set.seed(5)`.

```
for (n in c(1:N.perm))
{if (NLinks <= nrow(HP) | NLinks <= ncol(HP))
  {flag2 <- TRUE
  while (flag2 == TRUE)
  {HP.perm <- t(apply(HP,1,sample))
  if(any(colSums(HP.perm) == NLinks)) flag2 <- TRUE
  else flag2 <- FALSE}
```

```

} else { HP.perm <- t(apply(HP,1,sample))}
PACo.perm <- PACo(host.D, para.D, HP.perm)
m2.perm <- procrustes(PACo.perm$H.PCo, PACo.perm$P.PCo)$ss
write(m2.perm, file="PACo/example/m2_perm.txt", sep="\t", append=TRUE)
if (m2.perm <= m2.obs){P.value = P.value + 1}
}

```

Although the `write` function above is not essential for the analysis (and can be omitted), it is useful if one wishes to save the set of residual sum of squares generated at each permutation for further reference. Note the path pointing to the location where the file will be saved. Given that `append=TRUE`, the file created (`m2_perm.txt`) should be deleted or renamed prior to a new analysis. Otherwise the values generated in the new run will be appended to those produced in the previous one.

To conclude the goodness-of-fit test:

```

P.value <- P.value/N.perm
cat(" The observed m2 is ", m2.obs, "\n", P.value, " based on ", N.perm, "
permutations.")

```

The following output is produced:

```

There were 50 or more warnings (use warnings() to see the first 50)
The observed m2 is  0.1158733
P-value =  1e-05 based on  1e+05  permutations.

```

(The warnings are originated by each of the Procrustes analyses with the permuted host-parasite association matrix and result from the different number of columns in the host and parasite matrices. As noted above this has no effect on the analysis).

So  $m_{XY}^2 = 0.1159$ . In only one of the 100,000 random permutations the residual sum of squares was smaller than this value (i.e.,  $P = 10^{-5}$ ) and congruence between the host and parasite phylogenies is statistically significant at the conventional significance level of 0.05.

### ***Evaluation of host-parasite links***

As justified in the accompanying article, the contribution of each host-parasite to the global fit can be assessed with a jackknife procedure that estimates the squared residual and its 95% confidence interval of each individual link:

```

HP.ones <- which(HP > 0, arr.in=TRUE)
SQres.jackn <- matrix(rep(NA, NLinks**2), NLinks)

```

```

colnames (SQres.jackn) <- paste(rownames(HostX),rownames(ParY), sep="-")
t.critical = qt(0.975,NLinks-1)
for(i in c(1:NLinks))
{HP.ind <- HP
HP.ind[HP.ones[i,1],HP.ones[i,2]]=0
PACo.ind <- PACo(host.D, para.D, HP.ind)
Proc.ind <- procrustes(PACo.ind$H.PCo, PACo.ind$P.PCo)
res.Proc.ind <- c(residuals(Proc.ind))
res.Proc.ind <- append (res.Proc.ind, NA, after= i-1)
SQres.jackn [i, ] <- res.Proc.ind}
SQres.jackn <- SQres.jackn**2
SQres <- (residuals (HP.proc)**2
SQres.jackn <- SQres.jackn*(-(NLinks-1))
SQres <- SQres*NLinks
SQres.jackn <- t(apply(SQres.jackn, 1, "+", SQres))
phi.mean <- apply(SQres.jackn, 2, mean, na.rm = TRUE)
phi.UCI <- apply(SQres.jackn, 2, sd, na.rm = TRUE)
phi.UCI <- phi.mean + t.critical * phi.UCI/sqrt(NLinks)
pat.bar <- barplot(phi.mean, names.arg = " ", space = 0.25, col="white", xlab=
"Host-parasite link", ylab= "Squared residuals", ylim=c(0, max(phi.UCI)),
cex.lab=1.2)
text(pat.bar, par("usr")[3] - 0.001, srt = 330, adj = 0, labels =
colnames(SQres.jackn), xpd = TRUE, font = 1, cex=0.6)
arrows(pat.bar, phi.mean, pat.bar, phi.UCI, length= 0.05, angle=90)
abline(a=median(phi.mean), b=0, lty=2)

```

The foregoing code produces a bar chart of squared residuals (Fig. S1.2). Most links related to gopher species of *Orthogeomys*, *Geomys* and *Pappogeomys* contributed relatively little to  $m_{XY}^2$  and thus likely represent coevolutionary links. The links related to *Thomomys* spp. showed the highest residuals but their confidence intervals were quite broad (Fig. S1.2). Thus, it is difficult to evaluate their contribution to the cophylogenetic pattern observed.

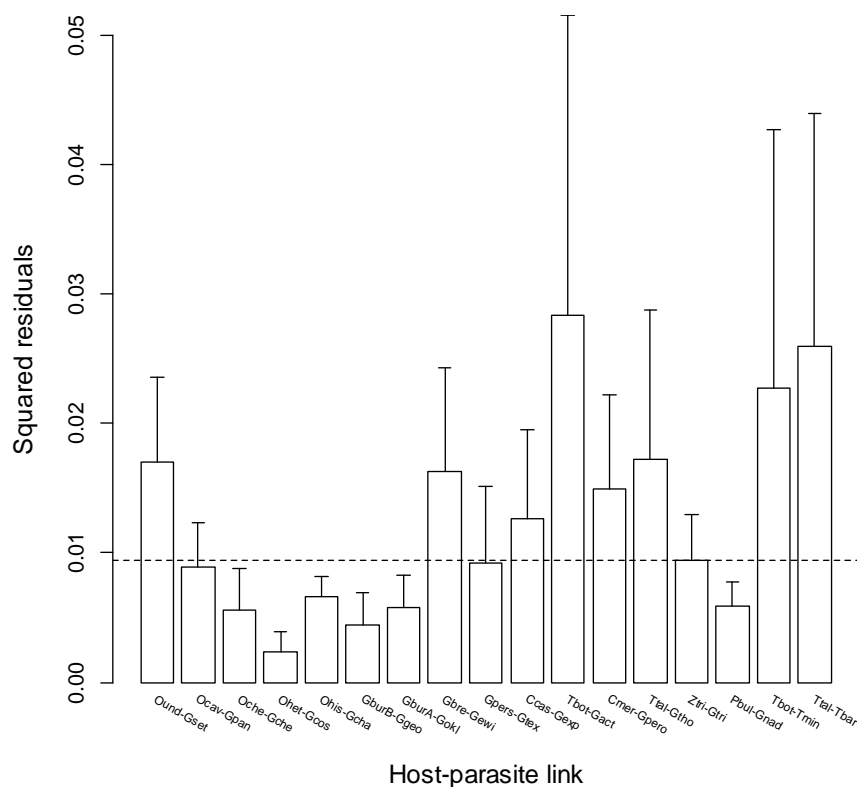

**Figure S2. Jackknifed squared residuals (bars) and upper 95% confidence intervals (error bars) associated to each gopher-lice link.** PACo was applied to HKY85 genetic distances. The dashed line indicates the median squared residual value. See Appendix for abbreviations of taxa.

## References

1. R Development Core Team (2011) R: A language and environment for statistical computing. R Foundation for Statistical Computing, Vienna, Austria. ISBN 3-900051-07-0.
2. Jousset E, Van Noort S, Berry V, Rasplus JY, Rønsted N, et al. (2008) One fig to bind them all: Host conservatism in a fig wasp community unraveled by cospeciation analyses among pollinating and nonpollinating fig wasps. *Evolution* 62: 1777-1797.
3. Legendre P, Desvevies Y, Bazin E (2002) A statistical test for host-parasite coevolution. *Syst Biol* 51: 217-234.
4. Hommla K, Smith JE, Qiu Y, Gilks WR (2009) A permutation test of host-parasite cospeciation. *Mol Biol Evol* 26: 1457-1468.
5. De Vienne DM, Giraud T, Shykoff JA (2007) When can host shifts produce congruent host and parasite phylogenies? A simulation approach. *J Evol Biol* 20: 1428-1438.
6. Paradis E (2006) *Analysis of Phylogenetics and Evolution with R*. New York: Springer. 211 p.
7. Oksanen J (2013) Multivariate analysis of ecological communities in R: vegan tutorial. Available: <http://cc.oulu.fi/~jarioksa/opetus/metodi/vegantutor.pdf>. Accessed 2013 March 12.
8. Hafner MS, Sudman PD, Villablanca FX, Spradling TA, Demastes JW, et al. (1994) Disparate rates of molecular evolution in cospeciating hosts and parasites. *Science* 265: 1087-1090.
9. Hafner MS, Demastes JW, Spradling TA, Reed DL (2003) Cophylogeny between pocket gophers and chewing lice. In: Page RDM, editor. *Tangled Trees: Phylogeny, Cospeciation and Coevolution*. Chicago: University of Chicago Press. pp. 195-220.
10. Felsenstein J, Churchill GA (1996) A Hidden Markov Model approach to variation among sites in rate of evolution. *Mol Biol Evol* 13: 93-104.
11. Swofford DL (2001) *PAUP\*. Phylogenetic analysis using parsimony (and other methods)*. Sinauer Associates.
12. Hasegawa M, Kishino H, Yano T (1985) Dating of the human-ape splitting by a molecular clock of mitochondrial DNA. *J Mol Evol* 22: 160-174.
13. Legendre P, Legendre L (1998) *Numerical Ecology*. Amsterdam: Elsevier. 853 p.



## Appendix

This appendix illustrates the format of the input files used in the present document. **Files should have matching taxa labels.** The following labels were used:

**Pocket gophers:** Ccas: *Cratogeomys castanops*; Cmer: *C. merriami*; GburA: *Geomys bursarius halli*; GburB: *G. bursarius majusculus*; Gbre: *G. breviceps*; Gpers: *G. personatus*; Ocav: *Orthogeomys cavator*; Oche: *O. cherriei*; Ohet: *O. heterodus*; Ohis: *O. hispidus*; Ound: *O. underwoodii*; Pbul: *Pappogeomys bulleri*; Ztri: *Zygoeomys trichopus*; Tbot: *Thomomys bottae*; Ttal: *T. talpoides*. **Chewing lice:** Gact: *Geomydoecus actuosus*; Gcha: *G. chapini*; Gche: *G. cherriei*; Gcos: *G. costaricensis*; Gewi: *G. ewingi*; Gexp: *G. expansus*; Ggeo: *G. geomydis*; Gnad: *G. nadleri*; Gokl: *G. oklahomensis*; Gpan: *G. panamensis*; Gpero: *G. perotensis*; Gset: *G. setzeri*; Gtex: *G. texanus*; Gtho: *G. thomomyus*; Gtri: *G. trichopi*; Tbar: *Thomomydoecus barbarae*; Tmin: *T. minor*.

### A1. Host-parasite association matrix (g-l\_links.txt)

Binary matrix with host and parasite species in rows and columns, respectively; 1's represent presence of a given parasite in a given host in nature, whereas 0's denote otherwise.

|       | Gset | Gpan | Gche | Gcos | Gcha | Ggeo | Gokl | Gewi | Gtex | Gexp | Gact | Gpero | Gtho | Gtri | Gnad | Tmin | Tbar |
|-------|------|------|------|------|------|------|------|------|------|------|------|-------|------|------|------|------|------|
| GburA | 0    | 0    | 0    | 0    | 0    | 0    | 1    | 0    | 0    | 0    | 0    | 0     | 0    | 0    | 0    | 0    | 0    |
| GburB | 0    | 0    | 0    | 0    | 0    | 1    | 0    | 0    | 0    | 0    | 0    | 0     | 0    | 0    | 0    | 0    | 0    |
| Gbre  | 0    | 0    | 0    | 0    | 0    | 0    | 0    | 1    | 0    | 0    | 0    | 0     | 0    | 0    | 0    | 0    | 0    |
| Gpers | 0    | 0    | 0    | 0    | 0    | 0    | 0    | 0    | 1    | 0    | 0    | 0     | 0    | 0    | 0    | 0    | 0    |
| Ound  | 1    | 0    | 0    | 0    | 0    | 0    | 0    | 0    | 0    | 0    | 0    | 0     | 0    | 0    | 0    | 0    | 0    |
| Ocav  | 0    | 1    | 0    | 0    | 0    | 0    | 0    | 0    | 0    | 0    | 0    | 0     | 0    | 0    | 0    | 0    | 0    |
| Oche  | 0    | 0    | 1    | 0    | 0    | 0    | 0    | 0    | 0    | 0    | 0    | 0     | 0    | 0    | 0    | 0    | 0    |
| Ohet  | 0    | 0    | 0    | 1    | 0    | 0    | 0    | 0    | 0    | 0    | 0    | 0     | 0    | 0    | 0    | 0    | 0    |
| Ohis  | 0    | 0    | 0    | 0    | 1    | 0    | 0    | 0    | 0    | 0    | 0    | 0     | 0    | 0    | 0    | 0    | 0    |
| Pbul  | 0    | 0    | 0    | 0    | 0    | 0    | 0    | 0    | 0    | 0    | 0    | 0     | 0    | 0    | 1    | 0    | 0    |
| Ccas  | 0    | 0    | 0    | 0    | 0    | 0    | 0    | 0    | 0    | 1    | 0    | 0     | 0    | 0    | 0    | 0    | 0    |
| Cmer  | 0    | 0    | 0    | 0    | 0    | 0    | 0    | 0    | 0    | 0    | 0    | 1     | 0    | 0    | 0    | 0    | 0    |
| Ztri  | 0    | 0    | 0    | 0    | 0    | 0    | 0    | 0    | 0    | 0    | 0    | 0     | 0    | 1    | 0    | 0    | 0    |
| Tbot  | 0    | 0    | 0    | 0    | 0    | 0    | 0    | 0    | 0    | 0    | 1    | 0     | 0    | 0    | 0    | 1    | 0    |
| Ttal  | 0    | 0    | 0    | 0    | 0    | 0    | 0    | 0    | 0    | 0    | 0    | 0     | 1    | 0    | 0    | 0    | 1    |

## A2. Tree files

Newick format files with branch lengths and taxon labels.

### A2.1 Pylogeny of pocket gophers (*phylo\_gopher.tre*):

```
(Ttal:0.07713,Tbot:0.08101,((((((Oche:0.02354,Ohet:0.01733):0.01634,(Ocav:0.04239,Ound:0.04272):0.01389):0.01327,Ohis:0.05788):0.03688,Pbul:0.08235):0.00364,(Cmer:0.04659,Ccas:0.05507):0.03224):0.0047,Ztri:0.10476):0.00323,(Gpers:0.05442,(Gbre:0.07104,(GburA:0.03003,GburB:0.04034):0.02281):0.01448):0.01172):0.04061);
```

### A2.2 Pylogeny of chewing lice (*phylo\_lice.tre*):

```
(Tbar:0.07682,Tmin:0.10403,((((((Gtho:0.14298,Gact:0.10454):0.01104,Gpero:0.10711):0.00819,(((Gche:0.07859,Gcos:0.05567):0.03793,(Gpan:0.07292,Gset:0.07992):0.01251):0.01527,Gcha:0.10553):0.01919):0.00187,((Gnad:0.11749,Gtri:0.09812):0.0122,(Gexp:0.11179,((Gtex:0.03366,Gewi:0.03409):0.06301,(Gokl:0.02618,Ggeo:0.02384):0.07929):0.01325):0.01303):0.0524):0.0262);
```

## A3. Aligned sequences

### A3.1 Sequences of pocket gophers (*alig\_gopher.fasta*):

>GburA

```
TGAAGTTTATATCTTAATTCTACCTGGATTTCGGAATAATTTACACATTGTTACTTATTATTCAGGAAAAAAGAACCCTTTTGGCTACATAGGCATAGTTTGAGCTATGATATCAA
TTGGATTTCCTAGGCTTTTATTGTATGAGCCCATCATATATTTACAGTAGGTATGGATGTAGACACCCGAGCCTATTTTACATCTGCAACTATAATCATTGCTATCCCAACAGGAGTA
AAAGTGTTTAGCTGACTAGCTACTTTACACGGAGGTAATATTTAAATGATCTCCTGCTATACTGTGAGCATTAGGCTTTATTTTCTTTTCACTATTGGCGGATTAACCTGGAATCGT
CCTATTCAACTCATCATTAGATATTGTATTA
```

>GburB

```
TGAAGTTTACATCTTAATCCTACCCGGATTTCGGAATAATTTCCCATATTGTTACCTATTACTCAGGAAAAAAGAGCCTTTTGGCTACATAGGCATAGTTTGAGCCATGATATCAA
TTGGATTTCCTAGGCTTTTATTGTTTGGAGCCCATCATATATTTACAGTAGGTATGGACGTAGATACCCGAGCCTATTTTACATCTGCAACTATAATCATTGCTATCCCAACAGGAGTA
AAAGTATTCAGCTGATTAGCTACTTTACACGGGGTAATATTTAAATGATCACCTGCTATACTGTGAGCATTAGGCTTTATTTTCTTTTCACTATTGGCGGGTTAACTGGAATTGT
CCTGTCCAACCTCATCATTAGACATTGTTCTA
```

>Gbre

TGAAGTTTTATATCTTGATCCTGCCAGGATTTGGAATAATTTACATATTTGTTACTTACTATTTCCGGAAAAAAGAGCCTTTTGGCTATATAGGTATAGTTTGGAGCTATAATATCAA  
TCGGATTTTTAGGCTTTATCGTGTGAGCCCACCATATATTTACAGTAGGTATGGATGTAGACACACGAGCTTACTTTACATCTGCTACTATAAATTATCGCCATCCCAACTGGAGTG  
AAAGTATTTAGCTGATTAGCCACTTTACACGGAGGTAATATTTAAATGGTCACCTGCTATATTTGTGAGCGCTAGGTTTTATTTTCTTTTCACTATCGGCGGATTAACCTGGAATCGT  
CCTGTCCAACCTCATCACTAGACATTGTTACTG

>Gpers

TGAGGTTTTACATCCTAATTCTACCAGGATTCGGTATAATTTACATATTTGTCACCTTATTATTTCAGGAAAAAAGGAACCCCTTTGGCTATATAGGCATAGTTTGGAGCTATAATATCAA  
TTGGGTTCTTAGGTTTTATTGTATGAGCCCACCATATATTTACAGTAGGCATGGACGTAGATACCCGAGCCTACTTTACATCTGCAACTATAAATTATCGCTATTTCTACAGGAGTA  
AAAGTATTTAGCTGACTAGCCACTCTACACGGAGGTAATATTTAAATGATCCCCCTGCTATACTATGAGCACTAGGCCTTTATTTTCTTTTCACTATTTGGTGGGCTAAGCTGGTATCGT  
CTTATCCAACCTCATCATTAGACATCGTACTG

>Ound

TGAAGTTTTATATCTTGATCCTCCCAGGATTCGGAATGATTTCTCATATTTGTCACCTACTATTTACAGGTAAAAAAGAACCCTTTGATTATATAGGCATGGTATGAGCTATAATATCTA  
TTGGTTTTCTTAGGTTTTATAGTATGAGCCCACCATATATTTACAGTAGGGATAGACGTAGATACACGAGCCTACTTTACATCCGCTACTATGATTATCGCTATCCCTACCGGAGTA  
AAAGTGTTCAGTTGACTAGCTACCATGAACGGAGGTAATATTTAAATGATCTCCTGCCATATTTATGAGCCTTAGGTTTTATTTTCTTTTCACTATTTGGTGGACTAACAGGCATTGT  
ATTATCTAATTCATCCTTAGACATTATTCTA

>Ocav

TGAAGTTTTATATCTTAATTCTCCCAGGCTTCGGAATGATTTCTCATATTTGTCACCTTACTACTCAGGTAAAAAAGAACCCTTTGATTATATAGGCGTGGTATGAGCTATAATATCCA  
TCGGATTCCTAGGTTTTGATAGTATGAGCCCACCATATATTTACAGTAGGAATAGACGTAGACACACGAGCCTATTTTACATCCGCTACTATAAATTATTGCTATTTCCACCGGAGTA  
AAAGTATTCAGTTGACTGGCTACCATGAACGGAGGTAATATTTAAATGATCTCCTGCCATATTTATGAGCCTTTAGGCTTTATCTTTCTATTTACAATTTGGTGGCCTAACCGGCATTGT  
ATTATCAAATTCATCCTTAGATATTATTCTA

>Oche

TGAAGTTTTACATCTTAATCCTCCCAGGCTTCGAAATAATCTCTCATATTTGTCACCTTATTATTTCAGGTAAAAAAGAACCCTTTGGCTATATAGGTATGGTATGAGCTATAATATCAA  
TTGGTTTTCTTAGGTTTTAATGGTATGAGCCCACCATATATTTACAGTAGGAATAGACGTAGATACACGAGCCTACTTTACATCCGCTACTATAAATTATTGCTATTTCTACCGGAGTA  
AAAGTATTCAGTTGACTAGCTACCATGAACGGAGGCAATATTTAAATGATCCCCCTGCCATATTTATGAGCCTTAGGTTTTATTTTCTATTTACAATTTGGTGGCCTAACCGGCATTGT  
ATTATCAAACCTCATCCTTAGATATTGTCCTA

>Ohet

TGAAGTTTTACATCTTAATCCTCCCAGGCTTCGGAATGATTTCTCATATTTGTCACCTTATTATTTCAGGTAAAAAAGAACCCTTTGGCTATATAGGCATGGTATGAGCTATAATATCAA  
TTGGTTTTCTTAGGTTTTATGGTATGAGCCCACCATATATTTACAGTAGGGATAGACGTAGATACACGAGCCTACTTTACATCCGCTACTATAAATTATTGCTATTTCTACAGGAGTA  
AAAGTATTCAGTTGACTGGCTACCATGAACGGAGGTAATATTTAAATGATCCCCCTGCCATATTTATGAGCCTTTAGGTTTTATTTTCTATTTACAATTTGGGGGCCTAACCGGCATTGT  
ACTATCCAACCTCATCATTGGATATTGTTCTA

>Ohis

TGAGGTTTTATATCTTAATCCTCCCAGGCTTCGGTATAATTTCTCATATCGTCACTTATTACTCAGGCAAAAAAGAACCCTTTGGATATATAGGCATGGTATGAGCCATAATATCTA  
TTGGTTTTCTTAGGTTTTATGGTATGAGCCCACCATATATTTACAGTAGGAATAGACGTAGACACACGAGCCTATTTTACATCTGCTACTATAAATTATCGCTATTTCTACCGGGTA  
AAAGTATTCAGTTGACTGGCTACACTGCATGGAGGTAATATTTAAATGATCTCCTGCCATATTTATGAGCCTTAGGTTTTATTTTCTATTTACTATCGGTGGTCTAACGGGCATTGT  
CCTATCAAATTCATCTTTGGATATCGTTCTA

>Pbul

TGAAGTTTTATATTTAATTCTCCCAGGTTTTGGAATAATTTACATATCGTAACCTATTATTCTGGTAAAAAAGAGCCATTCGGTTACATAGGTATAGTATGGGCTATAATATCAA  
TTGGCTTTCTTAGGATTTATCGTATGAGCCCACCATATATTTACAGTAGGAATGGACGTAGACACACGAGCCTATTTTACATCTGCAACTATAAATTATTGCTATCCCCACCGGAGTT  
AAAGTCTTTAGCTGACTGGCCACTCTTCATGGTGGTAATATTTAAATGATCACCTGCCATATTTATGAGCTCTAGGTTTTATTTTCTATTTCACTATTTGGAGGCTTAACCTGGTATCGT  
ACTATCAAATTCATCATTAGATATTGTCTTA

>Ccas

AGAGGTTTTATATCTTAATTTCTTCTGGATTGGTATAATTTACACATCGTCACTTATTACTCAGGTAAGAAAGAACCATTTGGCTATATAGGAATAGTTTGAGCCATAATATCAA  
 TTGGCTTTTTAGGCTTTCATCGTGTGAGCTCACCATATGTTTACGGTAGGGATAGATGTAGACACCCGAGCTTATTTTACATCTGCAACTATAATCATTTGCTATTCCTACAGGAGTA  
 AAAGTATTTAGTTGATTGGCCACCCTCCACGGAGTAATATTAATGATCACCAGCCACGTTATGAGCCCTAGGCTTTATTTTCTTTTTACTATTGGCGGATTAACCTGGTATCGT  
 GTTATCAAACCTCATCATTAGATATTGTACTA

>Cmer

AGAAGTCTATATCCTAATCCTCCCTGGATTCCGAATAATTTACACATCGTCACTTATTATTAGGTAAGAAAGAACCGTTTCGGTTATATAGGAATGGTTTGAGCTATAATATCAA  
 TTGGCTTTTTAGGTTTTCATCGTATGGGCCACCATATATTTACAGTAGGAATGGACGTAGACACCCGAGCTTATTTTACATCAGCAACTATAATTATTGCTATTCCTACCGGAGTA  
 AAAGTATTTAGTTGATTGGCCACCCTCCACGGAGTAATATTAATGATCACCAGCCACATTTATGAGCTCTAGGCTTTATTTTCTTTTTACTATTGGCGGTTTAACCTGGTATCGT  
 GTTATCAAACCTCATCATTAGATATCGTATTA

>Ztri

AGAAGTTTACATTCTAATCCTCCCTGGCTTCGGTATAATCTCACACATTGTCACTTACTTACTCAGGCAAGAAAGAACCATTTCCGATATATAGGTATAGTATGAGCTATAATGTCCA  
 TTGGCTTTCTAGGCTTTTATCGTATGAGCCCACCATATATTTACGGTAGGTATAGACGTAGATACACGAGCTTACTTTCACATCCGCAACAATAATTATCGCCATTCCTACTGGAGTA  
 AAAGTATTTAGCTGATTAGCTACATTACATGGAGTAATATCAAATGATCACCAGCTATGCTATGAGCCCTAGGCTTCATTTTCTTTTTACTATTGGTGGTCTAACAGGTATCGT  
 CCTATCCAACCTCATCACTAGATATCGTCTTA

>Tbot

TGAAGTTTATATCCTAATTTCTCCAGGGTTTGGAAATAATTTCCCATATTTGTTACCTACTTACTCAGGCAAGAAAGAACCTTTTCGATTATATGGGAATAGTATGAGCTATAATATCTA  
 TCGGATTTCTAGGTTTTTATTGTTTTGAGCACATCATATGTTTACAGTTGGAATAGACGTAGATACTCGAGCCTATTTTACATCTGCTACTATAATTATTGCTATTCCTACCGGTGTA  
 AAAGTTTTTACAGCTGACTTGGTACTCTTTCACGGAGGAAACATTAATGATCACCAGCTATGCTATGAGCATTGGGCTTTATTTTCTTTTTACAGTTGGAGGTTTAACCTGGAATTTG  
 TTTATCAAACCTCATCATTGGACATTGTACTA

>Ttal

AGAAGTTTATATCTTAATTTTACCTGGGTTTGGAAATAATTTCCACATTTGTTACTTACTACTCAGGCAAGAAAGAACCTTTTGGGTATATGGGAATAGTATGAGCCATAATATCAA  
 TCGGTTTTTAGGTTTTTATCGTATGAGCACACCACATGTTTACAGTGGGAATAGATGTAGATACCCGGGCTACTTTTACATCTGCTACAATAATTATTGCTATTTCCAACAGGAGTA  
 AAAGTTTTTACAGCTGATTAGCTACCTTTCATGGCGGTAATATTAATGATCCCCGCCATACTATGAGCATTAGGTTTTATTTTCTTTTTACAGTTGGAGGACTGACTGGAATTTG  
 TCTATCTAACTCATCACTAGATATTGTATTA

### ***A3.2 Sequences of chewing lice (alig\_lice.fasta):***

>Gset

CGAAGTTTATATTTTGGATTTTACCAGGTTTTGGGTTAATTTCTCAAATTTATTTTATTCGAGAGAGGAAAGCAAGTTTTTGGAACTGTAGGAATAATCTATGCTATAATAGCAA  
 TTGGAGTTCTTGGATTTCGTGGTTTTGAGCTCATCACATATTTACGGTTGGGATGGATGTGGATAGCCGGGCATATTTTACAAGAGCTACGATAGTAATTGCTGTTCCCTACTGGAGTT  
 AAAGTGTTTAGATGATTAGCCACTTCTTTTGGAAAGCCGAATTTTCATATTCGGTTTTCGATACCTTTGAACGCTGGGATTCGTATTTCCCTATTCACCGTGGGAGGGATGACAGGATTTGGT  
 GTTAGCTAATTCGTGCGTAGATGTGGTCCTA

>Gpan

AGAAGTTTATATTTTGGATTTTACCTAGATTTGGTTTGATTTCTCAAATTTATTTCTATTCGAAAGAGGAAAGAAACAGGTCTTTTGGAAACCGTGGGAATAATTTATGCAATAATAGCGA  
 TTGGAGTTCTTGGATTTGTGGTTTTGGGCTCATCACATATTTACTGTTGGGATAGATGTTGATAGACGAGCATAATTTTACGAGAGCTACGATAGTAATTGCCGTTCCAACAGGGGTA  
 AAGGTGTTTAGGTGATTGGCCACTTCTTTTGGAAAGCCGAATTTTCATATTCGGTTTTCGATGCTCTGAACATTTAGGATTCGTATTTCTGTTTACCGTTGGAGGGATAACGGGGTTAGT  
 TCTAGCCAATTCGTGTGTAGATGTAGTCCTA

>Gche

AGAAGTCTATATTTTGGATTTTACCCGGATTTGGTTTAATTTCCCAAATTTATTTTATTCGAAAGAGGGAAAAAGCAGGTTTTTGGTACCCTGGGTATAATTTATGCGATAATAGCAA  
 TCGGAGTATTGGGTTTTCGTGGTATGGGCTCATCACATGTTTACCGTTGGAAATGGATGTAGATAGCCGAGCATACTTACAAGAGCAACGATAGTAATTGCTGTTCCAACCGGGGTG

AAAGTATTTAGATGATTAGCCACTTCGTTCCGGGAGTCGAGTCTCTTATCCGTCTCTATACTTTGAACTTTGGGGTTCGTATTCTTGTTTACGGTAGGAGGAATAACAGGGTTAGT  
TTTAGCAAACCTCATGTGTGGACGTAGTCCTA

>Gcos

CGAAGTTTTATATTTTGGATTTTACCCGGATTTGGTTTTGATTTCTCAGATTATTTTTATTTGAAAGAGGAAAGAAGCAGGTTTTTTGGAACGTGTAGGGATAATTTATGCAATAATAGCAA  
TCGGAGTACTAGGTTTTCGTGGTATGGGCACACCACATGTTTACCGTTGGGATGGATGTTGACAGTTCGAGCGTATTTTACAAGAGCAACGATAGTAATTGCTGTTCCAACCTGGGGTA  
AAGGTATTTAGATGACTAGCCACTTCGTTTGGAAAGCCGGGTCTCTTATCCGTTTCCATGTTATGAACTCTAGGATTTGTATTCTTATTTACGGTAGGAGGAATAACAGGGTTGGT  
TTTAGCAAATTTCTTGTGTGGATGTAGTCCTA

>Gcha

CGAGGTATATATTTTAAATTTTACCAGGTTTTCGGTTTTAATTTCCCAGATTATTTCTATTCGAAAGGGGAAAGAAACAGGTTTTTTGGAACGTGTGGGATGATTTATGCTATAATGGCTA  
TTGGTATTCTTGGGTTTTGTCGTTTTGGGCGCATCACATGTTTACCGTAGGGATGGATGTTGACAGTTCGAGCATAATTTTACTAGAGCTACAATGGTTATTGCTGTTCCGACAGGAGTA  
AAAGTATTCAGTTGATTAGCTACTTCATTTGGAAGTCGGATTTTCGTATTCCGTTTTCTATTTTGTGAACCCTTGGGTTTCGTATTTTTTATTTACGGTTGGAGGAATGACAGGATTTAGT  
TTTGGCTAATTCGTGTGTTGATGTGGTCCTA

>Tmin

CGAGGTTTTATATTTTGGATCCTTCCCTGGATTTGGATTAATCTCCCAGATTATCCTTTTATGAAAGAGGAAAGAAACAGGTTTTTTGGGACAATTGGAATGATTTACGCTATAATAGCAA  
TTGGGGTATTAAGGTTTTGTGGTTTTGGGCCCATCACATATTTACTGTAGGCATAGATGTAGATAGACGGGCTTATTTTACCAGAGCCACTATGGTAATTGCTGTTCCAACCTGGGGTA  
AAGGTATTCAGGTGATTGGCCACATCTTTTGGGAGACGGATGTCATATTTCTATACTCTGGGCAATCGGGTTTTGTATTTTTTATTTACTGTCTGGGGGGATGACTGGTTTTAGT  
TTTGGCAAATTTCTTGTGTGGATGTGGTTTTA

>Tbar

CGAAGTTTTATATTTTAAATCTTACCAGGGTTTTGGTTTTAATTTCTCAAATCATTTTGTATGAAAGAGGAAAGAAGCAGGTTTTTTGGGACTATTGGGATGATTTATGCTATAATGGCGA  
TTGGGGTATTAGGTTTTGTGGTTTTGAGCACATCATATATTTACCGTTGGGATAGATGTCGATAGTTCGGGCATAATTTTACCAGGGCTACTATGGTAATTGCTGTTCTTACTGGAGTA  
AAAGTGTTTAGTTGATTAGCTACATCTTTTGGTAGACGAATATCATATTTCTATTTCCATGATATGAGCAATTTGGGTTTTGTATTTTTTATTTACCGTTGGAGGGATGACTGGTTTTAGT  
TTTAGCAAATTTCTTGTGTGGATGTGGTTCTT

>Gtri

AGAGGTTTTATATTTCTTATTCTTCCCTGGATTTGGGTTAATTTCCCACATTATTTTTATTTGAGAGAGGAAAAAGCAGGTTTTTCGGCACTATTGGGATAATTTATGCTATAATGGCTA  
TTGGTGTCTTGGCTTTGTAGTTTGGAGCCACCATATGTTTACTGTGGGGATAGATGTGGATAGACGAGCTTATTTTACTAGAGCAACAATGGTTATTGCTGTTCTTACTGGAGTA  
AAAGTTTTTGTAGTTGTTAGCTACTTCTTTTGGTGGACGAATGTCGTAATCTAGCTTCTATAATGTGGGCAGTAGGGTTTTGTGTTTTTATTTACCGTTGGGGGTATGACTGGTTGGT  
TTTGGCAAATTTCTTGTGTAGATGTAGTTCTC

>Gnad

AGAGGTTNTATATTTCTTATTCTCCCTGGATTTGATTTGATTTCTCACATCATTTTACTTGAAGAGGAAAGAAACAAGTATTTGGCACTGTGGGGATAATTTATGCTATGATGGCAA  
TTGGGGTCTTGGTTTTTGTGTATGAGCTCATCACATGTTTACCGTTGGGATAGACGTTGATAGACGGGCTTATTTTACAAGGGCAACTATGGTTATTGCAGTACCTACGGGGGT  
AAGGTATTTAGATGGTTAGCTACTTCTTTTGGGAGGCGAATAACTTATTCGTCTTCGATGATATGAGCGATTTGGGTTTCGTATTTTTTATTTACTGTCTGGGGCATGACCGGGTTAGT  
TTTAGCAAATTTCTTGTGTAGACGTTGTATTA

>Ggeo

AGAAGTATACATTCTAATCCTTCCGGAATTTGGTTTTAATTTCTCATATTGTATTATTGGAAAGGGGAAAAAGCAGGTTTTTTGGTACTGTTGGGATAATTTACGCAATAATAGCAA  
TTGGAGTTCTTGGTTTTTGTAGTCTGAGCTCACCACATATTTACTGTAGGAATGGATGTTGATAGCCGGGCATAATTTTACTAGGGCGACTATGGTAATTGCGGTACCTACTGGGGTA  
AAGGTTTTTAGATGATTGGCCACTTCTTTCCGGAGGCGAATTTTACTACTCCGTTTTCGACACTGTGGGCATTTGGTTTTTCTATTTTCTTATTTACTATTGGTGGGATAACAGGTTTAGT  
TTTAGCAAATTTCTTGTGTAGATGTGGTCCTA

>Gokl

AGAAGTATACATTCTAATCCTTCCGGGATTCGGGTTAATCTCTCATATTGTATTATTGGAAAGAGGAAAAAGCAGGTTTTTTGGTACTGTTGGGATAATTTACGCAATAATAGCAA  
TTGGAGTTCTTGGTTTTTGTAGTCTGAGCTCACCATATATTTACTGTAGGAATAGATGTTGATAGCCGGGCATACTTTTACTAGGGCGACTATGGTAATTGCGGTGCTTACTGGAGTA  
AAGGTTTTTAGGTGATTGGCCACTTCTTTCCGGAGGCGAATTTTACTACTCCGTTTTCGACACTGTGGGCATTTGGTTTTTATTTTTCTATTTACTATTGGTGGGATAACAGGTTTAGT  
TCTAGCAAATTTCTTGTGTAGATGTGGTCCTA

>Gewi

TGAAGTTTATATTCTGATTCTTCCAGGATTTGGGTTAATCTCCCACATTGTCCTGTTAGAAAGAGGAAAGAAACAAGTCTTTGGCAGTGTTCGGAATAATTTATGCAATAATAGCAA  
TTGGGGTCCCTTGGTTTTGTAGTTTGTAGCCCATCACATGTTTACTGTGGGAATGGATGTTGATAGCCGAGCATATTTTACTAGAGCGACTATAGTAATTGCGGTGCCCTACCGGAGTA  
AAGGTCTTTAGGTGGCTTGCTACTTCTTTTGGAAAGTCGGATTTTCGTACTCCGTATCGATGCTATGGTTCGTTTGGCTTTATTTTTTTTATTTACTATCGGCGGCATGACAGGATTAGT  
TTTAGCAAATTTCTTGTGTAGATGTGGTATTA

>Gtex

TGAAGTTTATATTTTTGATCCTTCCAGGATTTGGATTAATCTCCCACATTGTCCTGTTAGAAAGAGGAAAGAAACAAGTCTTTGGTACTGTTCGGAATAATTTATGCAATAATAGCAA  
TTGGGGTCTTGGTTTTGTAGTTTGTAGCCACCACATGTTTACTGTAGGGATAGATGTTGATAGCCGGGCATATTTTACTAGAGCTACCATGGTAATTGCGGTACCTACTGGAGTA  
AAGGTCTTTAGGTGGCTTGCTACTTCTTTTGGAAAGTCGGATTTTCGTATTCCGTATCAATACTATGGTCAATTTGGTTTTATTTTTTTTATTTACTATCGGCGGCATGACAGGATTAGT  
TTTAGCAAATTTCTCGAGTAGACGTGGTACTA

>Gexp

AGAAGTTTACATTTTGTATTCTTCCAGAATTCGGTTTTAATTTCCCATATTATTTTACTTGAGAGAGGAAAGAAACAAGTTTTTGGGACTGTTGGGATGATTTATGCGATAATGGCGA  
TTGGAGTTTTAGGGTTTGTAGTCTGAGCTCACCACATATTTACTGTTGGGATAGATGTTGACAGTCGGGCATATTTTACCAGGGCAACCATGGTGTATGTCAGTGCCTACTGGGGTT  
AAAGTTTTTLAGGTGGTTGGCTACTTCTTTTGGTAGTCGACTTTTCGTATTCAATTTTCGACACTTTGGGCATTTGGGTTTTATTTTCTTATTTACTATTAGGGGTACGACTGGATTAGT  
TTTGGCGAATTCGTGTGTAGATGTAGTCCTA

>Gpero

AGAAGTATATATTTTTAATTTTACCCGGATTTGGATTAATTTCCCAAATTTATTTTATTTGAGAGAGGAAAAAACAAGTTTTTGGGACAATTTGGTATAATTTATGCAATAATGGCAA  
TTGGTGTTTTTAGGTTTTGTGGTATGGGCTCATCATATATTTACTGTAGGTATGGATGTAGACAGTCGTGCATATTTTACTAGGGCTACAATAGTAATTGCGGTTCCTACTGGTGT  
AAGGTTTTTLAGGTGGCTAGCTACATCTTTTGGAAAGTCGAATATCGTTTACAACATCAATGTTGTGGGCGATTGGATTTGTATTTTTTATTTACTGTAGGAGGGATAACAGGTTTAGT  
TTTAGCTAATTCCTGTGTAGATGTGGTTTTA

>Gtho

TGAAGTGTATATTTTAAATTTCTACCAGGATTTGGTTTTGATTTCTCGAATCATTTTGTTCGAAAGAGCAAAAAACAAGTGTTCGGTACAGTAGGCATAATTTATGCTATAACTGCTA  
TTGGAGTATTGGGGTTTGTGGTGTGAGCCCATCACATGTTTACTGTTGGTATAGATGTAGATAGTCGAGCATACTTTACTAGAGCAACTATAGTTATTGCTGTCCCTACTGGGGTA  
AAAGTATTTAGATGGCTTGCTACATCTTTTGGCAGCCGAGTGTCTTACTCTGTCTCTCTTTTATGATCTTCTGGATTTGTATTCCTATTTACTGTAGGAGGAATAACTGGTTTTGGT  
ATTAGCTAATTCATGTGTAGATGTAATTTTA

>Gact

CGAAATGTATATTTTAAATCCTACCAGGATTCGGTTTTAATTTCTCACATTATTTTATTAGAAAGAGGAAAAAACAAGTTTTTGGCAGTGTTCGGAATAATTTATGCGATAATGGCTA  
TTGGTGTATTGGGATTTGTGGTTTTGAGCTCACCACATATTCACAGTTTGGAAATAGATGTAGATAGTCGAGCGTATTTTACTAGGGCAACTATAGTAATTGCGGTACCTACTGGGGTA  
AAAGTTTTTLAGGTGACTTGCTACCTCCTTTGGAAGTCGAATTTCTTCTCCGTTTCGATAATATGGGCCTTTCGGCTTTATTTTTTTTGTACTATTGGCGGTATAACGGGCTTAGT  
GTTGGCAAATTCATGTGTAGACGTCGTCTTC

## A4. Genetic distances

### A4.1 HKY85 distance matrix of pocket gophers (*dist\_gopher.txt*):

|       | GburA   | GburB   | Gbre    | Gpers   | Ound    | Ocav    | Oche    | Ohet    | Ohis    | Pbul    | Ccas    | Cmer    | Ztri    | Tbot    | Ttal    |
|-------|---------|---------|---------|---------|---------|---------|---------|---------|---------|---------|---------|---------|---------|---------|---------|
| GburA | 0       | 0.07036 | 0.12782 | 0.115   | 0.20408 | 0.20273 | 0.19576 | 0.17476 | 0.21425 | 0.15956 | 0.16259 | 0.17248 | 0.20074 | 0.19232 | 0.17722 |
| GburB | 0.07036 | 0       | 0.13025 | 0.12348 | 0.19983 | 0.21755 | 0.19538 | 0.1709  | 0.20616 | 0.18745 | 0.19825 | 0.20861 | 0.20414 | 0.18526 | 0.20606 |
| Gbre  | 0.12782 | 0.13025 | 0       | 0.14761 | 0.20842 | 0.24667 | 0.21918 | 0.20787 | 0.2265  | 0.1779  | 0.18249 | 0.1972  | 0.19659 | 0.22756 | 0.20515 |
| Gpers | 0.115   | 0.12348 | 0.14761 | 0       | 0.17846 | 0.19938 | 0.15333 | 0.14377 | 0.17094 | 0.17019 | 0.15947 | 0.15104 | 0.16814 | 0.18461 | 0.20125 |
| Ound  | 0.20408 | 0.19983 | 0.20842 | 0.17846 | 0       | 0.08511 | 0.0948  | 0.08823 | 0.13279 | 0.20057 | 0.23937 | 0.19607 | 0.21642 | 0.20669 | 0.23728 |
| Ocav  | 0.20273 | 0.21755 | 0.24667 | 0.19938 | 0.08511 | 0       | 0.09557 | 0.09427 | 0.11633 | 0.1757  | 0.21863 | 0.18528 | 0.22771 | 0.19941 | 0.23171 |
| Oche  | 0.19576 | 0.19538 | 0.21918 | 0.15333 | 0.0948  | 0.09557 | 0       | 0.04087 | 0.11613 | 0.17989 | 0.20765 | 0.17847 | 0.19638 | 0.19917 | 0.20537 |
| Ohet  | 0.17476 | 0.1709  | 0.20787 | 0.14377 | 0.08823 | 0.09427 | 0.04087 | 0       | 0.10577 | 0.18019 | 0.19657 | 0.18165 | 0.20042 | 0.19946 | 0.19587 |
| Ohis  | 0.21425 | 0.20616 | 0.2265  | 0.17094 | 0.13279 | 0.11633 | 0.11613 | 0.10577 | 0       | 0.17213 | 0.18182 | 0.16737 | 0.2097  | 0.21779 | 0.22399 |
| Pbul  | 0.15956 | 0.18745 | 0.1779  | 0.17019 | 0.20057 | 0.1757  | 0.17989 | 0.18019 | 0.17213 | 0       | 0.1868  | 0.14119 | 0.19351 | 0.21842 | 0.22155 |
| Ccas  | 0.16259 | 0.19825 | 0.18249 | 0.15947 | 0.23937 | 0.21863 | 0.20765 | 0.19657 | 0.18182 | 0.1868  | 0       | 0.10166 | 0.20622 | 0.21578 | 0.18191 |
| Cmer  | 0.17248 | 0.20861 | 0.1972  | 0.15104 | 0.19607 | 0.18528 | 0.17847 | 0.18165 | 0.16737 | 0.14119 | 0.10166 | 0       | 0.17967 | 0.2126  | 0.22256 |
| Ztri  | 0.20074 | 0.20414 | 0.19659 | 0.16814 | 0.21642 | 0.22771 | 0.19638 | 0.20042 | 0.2097  | 0.19351 | 0.20622 | 0.17967 | 0       | 0.23958 | 0.22094 |
| Tbot  | 0.19232 | 0.18526 | 0.22756 | 0.18461 | 0.20669 | 0.19941 | 0.19917 | 0.19946 | 0.21779 | 0.21842 | 0.21578 | 0.2126  | 0.23958 | 0       | 0.15814 |
| Ttal  | 0.17722 | 0.20606 | 0.20515 | 0.20125 | 0.23728 | 0.23171 | 0.20537 | 0.19587 | 0.22399 | 0.22155 | 0.18191 | 0.22256 | 0.22094 | 0.15814 | 0       |

**A4.2 HKY85 distance matrix of chewing lice (*dist\_lice.txt*):**

|       | Gset    | Gpan    | Gche    | Gcos    | Gcha    | Tmin    | Tbar    | Gtri    | Gnad    | Ggeo    | Gokl    | Gewi    | Gtex    | Gexp    | Gpero   | Gtho    | Gact    |
|-------|---------|---------|---------|---------|---------|---------|---------|---------|---------|---------|---------|---------|---------|---------|---------|---------|---------|
| Gset  | 0       | 0.15285 | 0.20774 | 0.18508 | 0.20672 | 0.28637 | 0.20558 | 0.25492 | 0.25773 | 0.23895 | 0.25154 | 0.24683 | 0.24684 | 0.26487 | 0.25636 | 0.2713  | 0.27781 |
| Gpan  | 0.15285 | 0       | 0.20307 | 0.18012 | 0.21644 | 0.24089 | 0.23687 | 0.26877 | 0.23214 | 0.23289 | 0.22842 | 0.23888 | 0.24289 | 0.26214 | 0.24513 | 0.26842 | 0.25225 |
| Gche  | 0.20774 | 0.20307 | 0       | 0.13426 | 0.24437 | 0.28942 | 0.27768 | 0.31042 | 0.28377 | 0.24705 | 0.27571 | 0.2955  | 0.30766 | 0.30526 | 0.26057 | 0.24025 | 0.26306 |
| Gcos  | 0.18508 | 0.18012 | 0.13426 | 0       | 0.20368 | 0.26451 | 0.22371 | 0.27052 | 0.25355 | 0.25926 | 0.28869 | 0.25906 | 0.26638 | 0.2914  | 0.23581 | 0.23521 | 0.27029 |
| Gcha  | 0.20672 | 0.21644 | 0.24437 | 0.20368 | 0       | 0.25833 | 0.21789 | 0.22702 | 0.26045 | 0.27646 | 0.28893 | 0.24521 | 0.24124 | 0.25057 | 0.23825 | 0.29333 | 0.26947 |
| Tmin  | 0.28637 | 0.24089 | 0.28942 | 0.26451 | 0.25833 | 0       | 0.18085 | 0.23405 | 0.27406 | 0.26303 | 0.25934 | 0.24557 | 0.22602 | 0.26036 | 0.24257 | 0.31228 | 0.2839  |
| Tbar  | 0.20558 | 0.23687 | 0.27768 | 0.22371 | 0.21789 | 0.18085 | 0       | 0.21219 | 0.23126 | 0.25821 | 0.25332 | 0.28135 | 0.25983 | 0.2348  | 0.20537 | 0.26172 | 0.23509 |
| Gtri  | 0.25492 | 0.26877 | 0.31042 | 0.27052 | 0.22702 | 0.23405 | 0.21219 | 0       | 0.21561 | 0.26088 | 0.2447  | 0.24405 | 0.24713 | 0.22154 | 0.2393  | 0.28044 | 0.24128 |
| Gnad  | 0.25773 | 0.23214 | 0.28377 | 0.25355 | 0.26045 | 0.27406 | 0.23126 | 0.21561 | 0       | 0.26134 | 0.27782 | 0.2428  | 0.25414 | 0.25364 | 0.26446 | 0.28466 | 0.26895 |
| Ggeo  | 0.23895 | 0.23289 | 0.24705 | 0.25926 | 0.27646 | 0.26303 | 0.25821 | 0.26088 | 0.26134 | 0       | 0.05002 | 0.21445 | 0.20119 | 0.20727 | 0.26013 | 0.31126 | 0.22115 |
| Gokl  | 0.25154 | 0.22842 | 0.27571 | 0.28869 | 0.28893 | 0.25934 | 0.25332 | 0.2447  | 0.27782 | 0.05002 | 0       | 0.19903 | 0.19007 | 0.20666 | 0.24403 | 0.3197  | 0.22055 |
| Gewi  | 0.24683 | 0.23888 | 0.2955  | 0.25906 | 0.24521 | 0.24557 | 0.28135 | 0.24405 | 0.2428  | 0.21445 | 0.19903 | 0       | 0.06775 | 0.25981 | 0.2385  | 0.26712 | 0.21988 |
| Gtex  | 0.24684 | 0.24289 | 0.30766 | 0.26638 | 0.24124 | 0.22602 | 0.25983 | 0.24713 | 0.25414 | 0.20119 | 0.19007 | 0.06775 | 0       | 0.22878 | 0.24655 | 0.29137 | 0.23083 |
| Gexp  | 0.26487 | 0.26214 | 0.30526 | 0.2914  | 0.25057 | 0.26036 | 0.2348  | 0.22154 | 0.25364 | 0.20727 | 0.20666 | 0.25981 | 0.22878 | 0       | 0.24703 | 0.31316 | 0.22625 |
| Gpero | 0.25636 | 0.24513 | 0.26057 | 0.23581 | 0.23825 | 0.24257 | 0.20537 | 0.2393  | 0.26446 | 0.26013 | 0.24403 | 0.2385  | 0.24655 | 0.24703 | 0       | 0.24623 | 0.2376  |
| Gtho  | 0.2713  | 0.26842 | 0.24025 | 0.23521 | 0.29333 | 0.31228 | 0.26172 | 0.28044 | 0.28466 | 0.31126 | 0.3197  | 0.26712 | 0.29137 | 0.31316 | 0.24623 | 0       | 0.24752 |
| Gact  | 0.27781 | 0.25225 | 0.26306 | 0.27029 | 0.26947 | 0.2839  | 0.23509 | 0.24128 | 0.26895 | 0.22115 | 0.22055 | 0.21988 | 0.23083 | 0.22625 | 0.2376  | 0.24752 | 0       |
